# Supplementary material
Source: PubMed Central journal article supplement (PMC1478174)
Supplement: 7601127s7.pdf [file 7601127s7.pdf]

**Supplementary Figure 1S:** Failure of nocodazole to induce DNA damage foci. **A.** Representative immunofluorescence images of HCT116 Bax KO cells treated with cisplatin (4  $\mu$ M, 36 h) or nocodazole (100 nM, 36 h) and stained with Hoechst 33342 (blue) and a monoclonal antibody recognizing histone H2AX phosphorylated on serine 139 (H2AX $\gamma$ , Trevigen) revealed by an Alexa-568-labeled goat anti-mouse conjugate (Molecular Probes, red fluorescence). **B.** Percentage of cells positive for H2AX $\gamma$  as determined in A.
