# Supplementary material
Source: PubMed Central journal article supplement (PMC1478174)
Supplement: 7601127s9.pdf [file 7601127s9.pdf]

**Supplementary Figure 3S:** Normal BubR1 expression and phosphorylation in wild type, p53 KO and Bax KO HCT116 cells treated with nocodazole. Cells were cultured during the indicated period with the spindle poison, followed by immunoblot detection of BubR1 and GAPDH as a loading control.
