# Supplementary material
Source: PubMed Central journal article supplement (PMC1478174)
Supplement: 7601127s10.pdf [file 7601127s10.pdf]

**Supplementary Figure 4S:** Normal genotype of tetraploid cells. **A.** Metaphase spreads from representative diploid (left) or tetraploid (right) RKO clones were subjected to FISH with centromere-specific probes recognizing chromosomes 18 (red) and X (green). FISH analyses were done with probes specific for the 18 and X chromosomes centromere (Q-biogen). **B.** Comparative Genomic Hybridization results (dye-swap test) of the clone TA (labeled by Cy 5 - blue curve or in Cy 3 - red curve) compared to the clone DY (labeled by Cy3 for the flip or Cy5 for the flop test). Quantitative genomic abnormalities are not present when the ratio between the two genomes is 1. Pan-genomic DNA microarrays with 1Mb resolution were purchased from Spectral Genomics Inc., Houston, Texas, USA. DNA labeling, hybridization and post-hybridization procedures were in accordance with the manufacturer's recommendations. The slides were scanned with an Agilent scanner (Agilent Technologies, Inc., Santa Clara, California, USA). Images were analysed by using the Spectralware 2.0 computer program (Spectral Genomics, Inc.).
