# Supplementary material
Source: PubMed Central journal article supplement (PMC1478174)
Supplement: 7601127s12.pdf [file 7601127s12.pdf]

**Supplementary Figure 6S:** Hierarchical cluster analysis of 567 gene expression profiles in the 8 RKO cell lines, performed as in Fig. 5S. Clones TA, TB, TC and TD are tetraploid and clones DW, DY, DX and DZ are diploid (see Fig. 4B).
