# Supplementary material
Source: PubMed Central journal article supplement (PMC1478174)

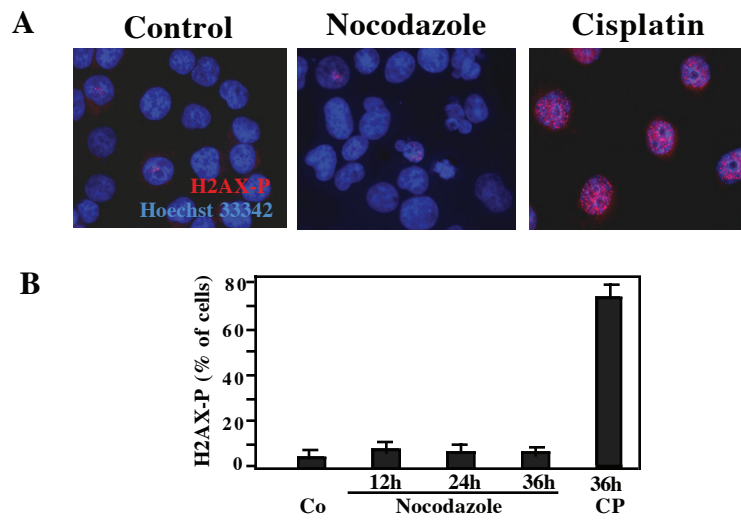

Figure 1S

Supplement: 7601127s1.pdf [file 7601127s1.pdf]

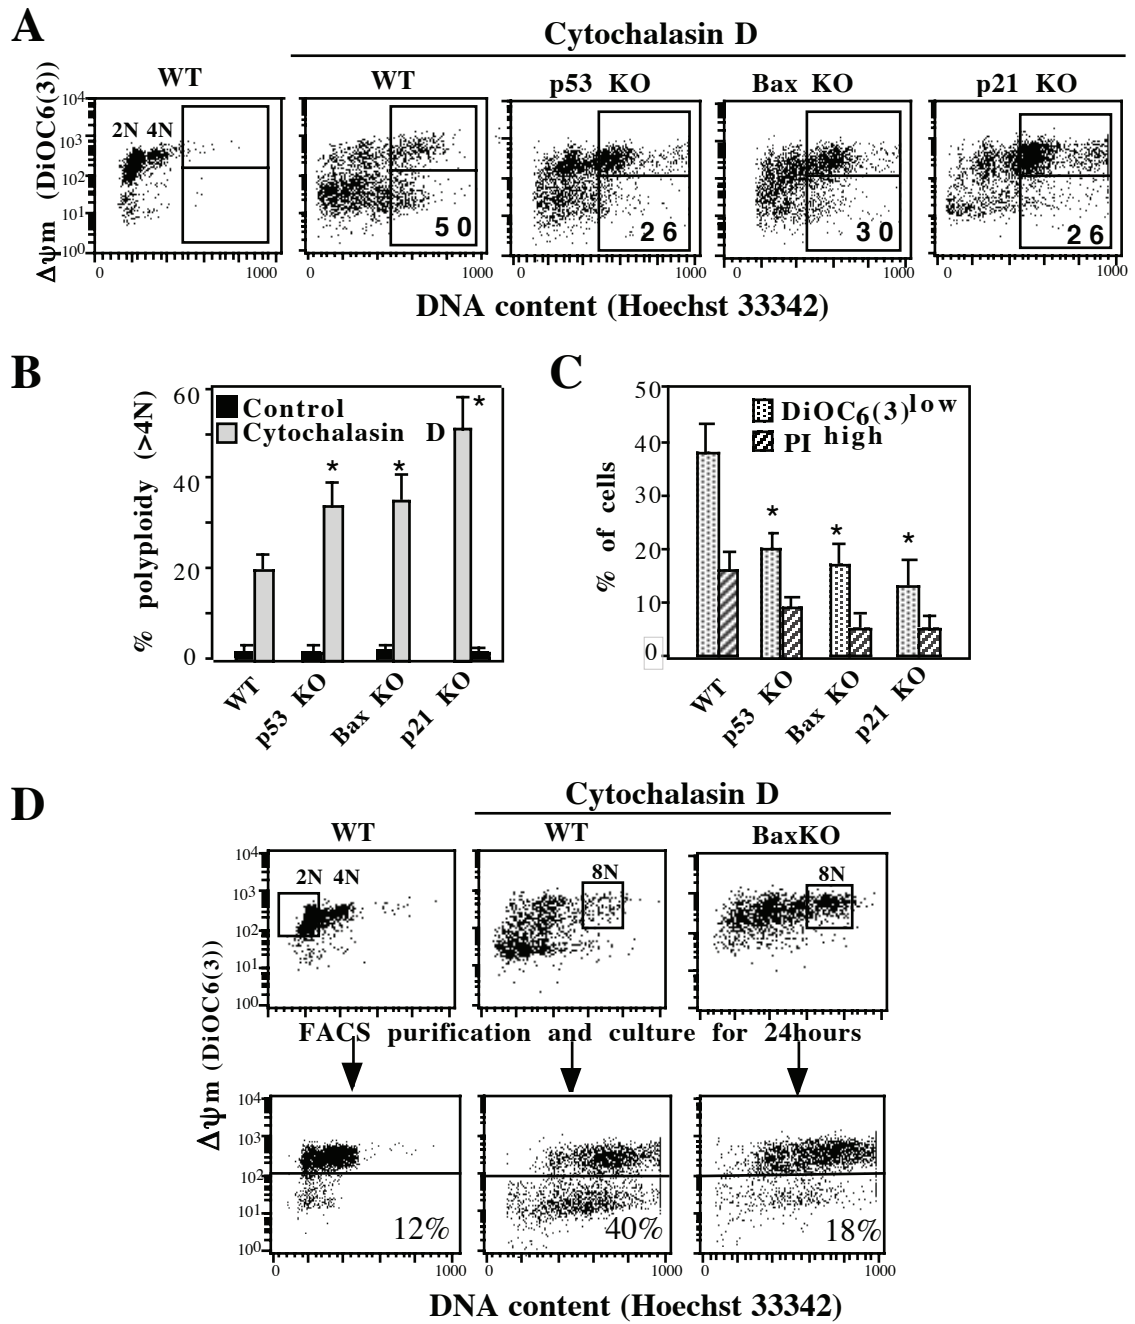

**Figure 2S**

Supplement: 7601127s2.pdf [file 7601127s2.pdf]

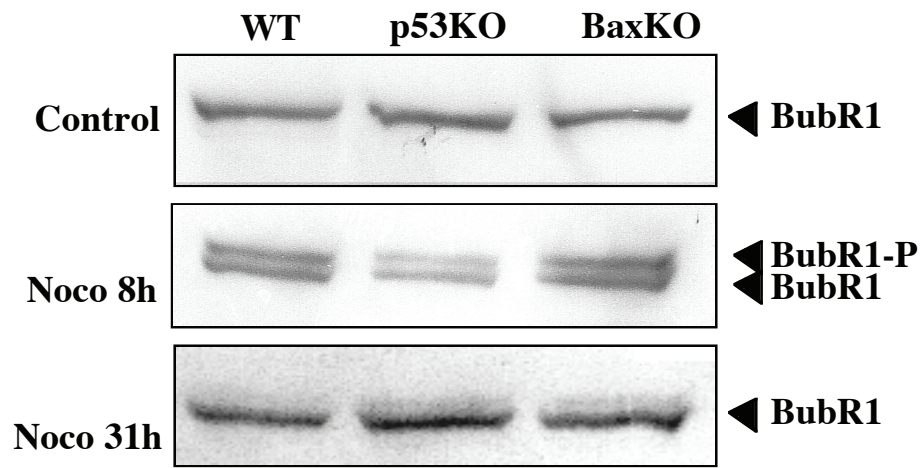

**Figure 3S**

Supplement: 7601127s3.pdf [file 7601127s3.pdf]

**A**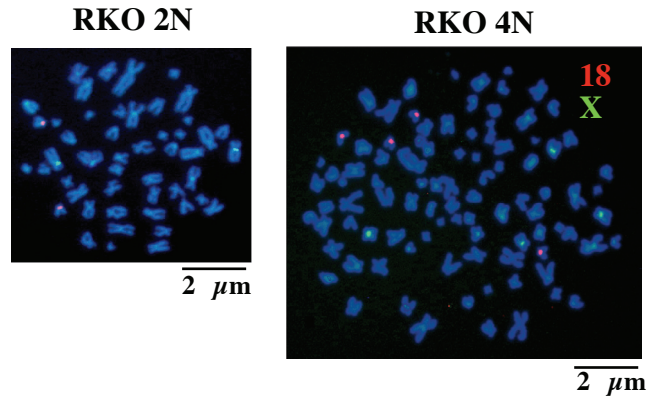**B**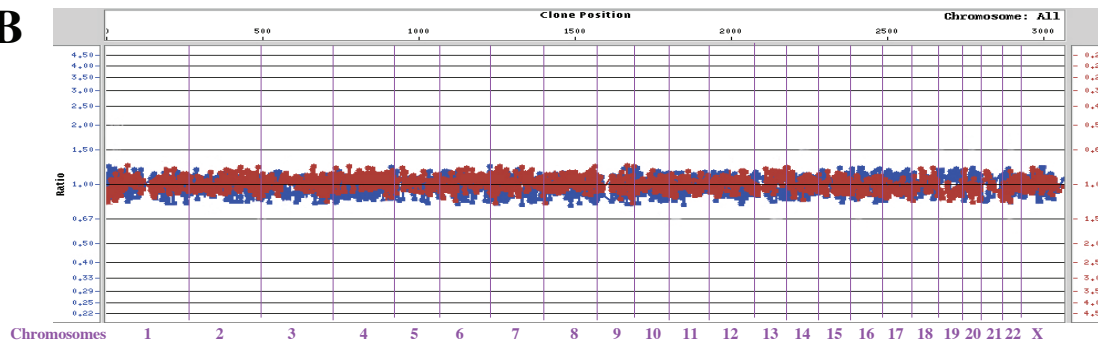**Figure 4 S**

Supplement: 7601127s4.pdf [file 7601127s4.pdf]

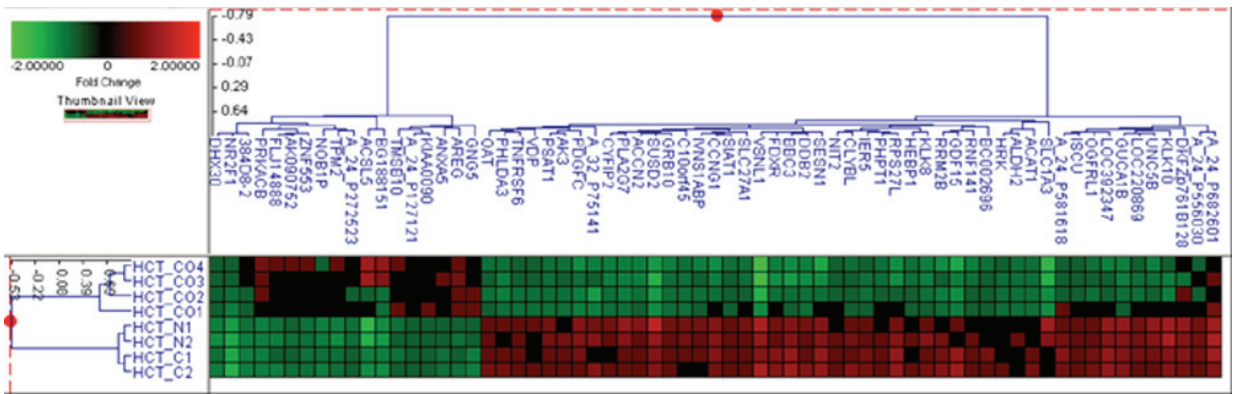

**Figure 5S**

Supplement: 7601127s5.pdf [file 7601127s5.pdf]

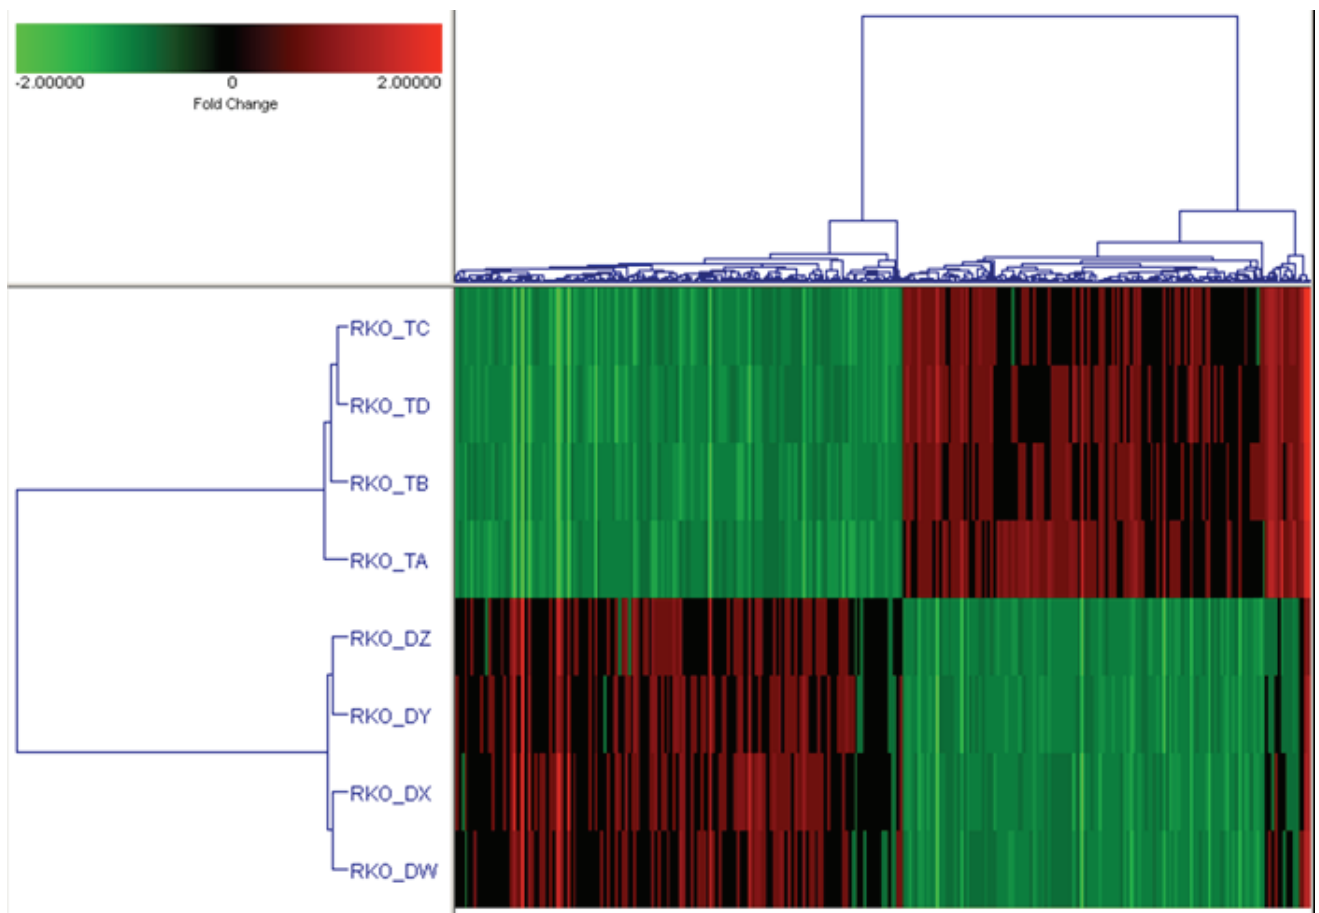

**Figure 6S**

Supplement: 7601127s6.pdf [file 7601127s6.pdf]
